# Supplementary material
Source: publisher site journal article supplement (https://www.dovepress.com/article/257779)
Supplement: Supplementary file 1 [file get_supplementary_file.php]

**
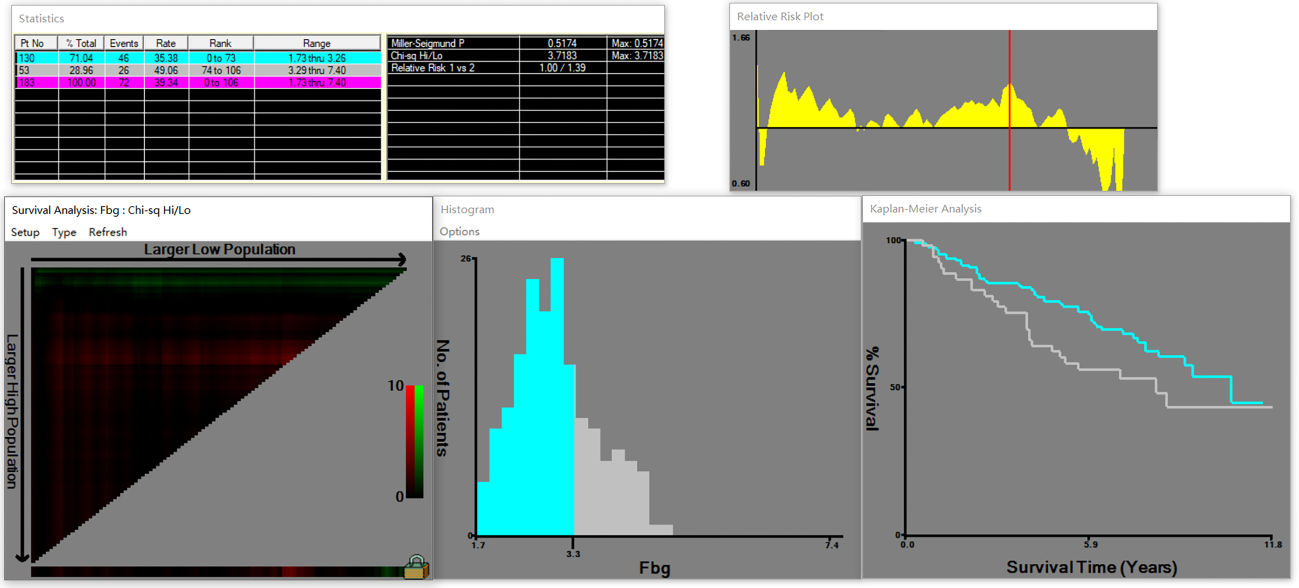
**

**Figure S1.** X title software indicated that the optimal cut-off value of fibrinogen for OS analysis in skull base chordoma was 3.29 g/L. OS, overall survival


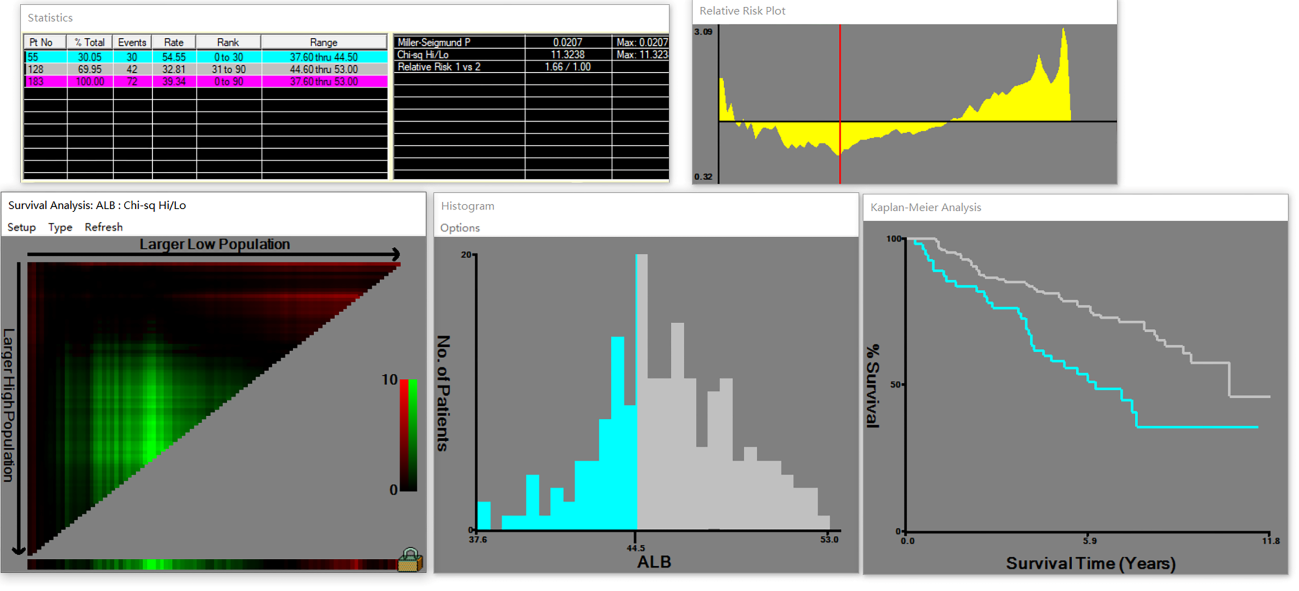


**Figure S2.** X title software indicated that the optimal cut-off value of albumin for OS analysis in skull base chordoma was 44.60 g/L. OS, overall survival
